# Supplementary material for: QTL Mapping in Eggplant Reveals Clusters of Yield-Related Loci and Orthology with the Tomato Genome
Source: PLoS One. 2014 Feb 21;9(2):e89499. doi: 10.1371/journal.pone.0089499 (PMC3931786; doi:10.1371/journal.pone.0089499)
Supplement: Table S1 — Haplotype variation within the 0–10.4 cM region of chromosome E02, showing the presence of a Solanum aethiopicum chromosome segment in ‘305E40’. (XLSX) [file pone.0089499.s002.xlsx]

## Sheet: Foglio1
Marker name	Position	Parental lines		F1	Progenitors of 305E40 parental line
		305E40	67-3		S.aethiopicum	S. melongena cv TAL1/1	S. melongena cv DOURGA	S. melongena cv DR2
em133	0	AA	BB	AB	AA	BB	BB	BB
em114	1.128	AA	BB	AB	AA	BB	BB	BB
Rfo-sa1	5.188	AA	BB	AB	AA	BB	BB	BB
C2_At1g30580	5.911	AA	BB	AB	AA	BB	BB	BB
36006_PstI_L370	7.669	AA	BB	AB	AA	BB	BB	BB
21207_PstI_L411	7.958	AA	BB	AB	AA	BB	BB	BB
10989_PstI_L465	8.143	AA	BB	AB	AA	BB	BB	BB
35319_PstI_L271	8.143	AA	BB	AB	AA	BB	BB	BB
10573_PstI_L346	8.204	AA	BB	AB	AA	BB	BB	BB
13781_PstI_L382	8.204	AA	BB	AB	AA	BB	BB	BB
26125_PstI_L310	8.204	AA	BB	AB	AA	BB	BB	BB
10573_PstI_L346	8.204	AA	BB	AB	AA	BB	BB	BB
26134_PstI_L344	8.528	AA	BB	AB	AA	BB	BB	BB
9146_PstI_L314	8.528	AA	BB	AB	AA	BB	BB	BB
17824_PstI_L385	8.63	AA	BB	AB	AA	BB	BB	BB
19677_PstI_L468	8.836	AA	BB	AB	AA	BB	BB	BB
11363_PstI_L344	9.504	AA	BB	AB	AA	BB	BB	BB
29269_PstI_L370	9.547	AA	BB	AB	AA	BB	BB	BB
37466_PstI_L352	9.547	AA	BB	AB	AA	BB	BB	BB
26410_PstI_L409	9.573	AA	BB	AB	AA	BB	BB	BB
31745_PstI_L299	9.782	AA	BB	AB	AA	BB	BB	BB
31446_PstI_L332	9.865	AA	BB	AB	AA	BB	BB	BB
30889_PstI_L365	10.364	AA	BB	AB	AA	BB	BB	BB
1852_PstI_L452	10.524	BB	AA	AB	BB	AA	BB	AA
